# Origins of pandemic clones from environmental gene pools

B. Jesse Shapiro<sup>1</sup>, Inès Levade<sup>1#</sup>, Gabriela Kovacikova<sup>2#</sup>, Ronald K. Taylor<sup>2</sup>, Salvador Almagro-Moreno<sup>2,3\*</sup>

<sup>1</sup>Department of Biological Sciences, University of Montreal, Montreal, Quebec, Canada.

<sup>2</sup>Department of Microbiology and Immunology, Geisel School of Medicine at Dartmouth, Hanover, New Hampshire, USA. <sup>3</sup>Burnett School of Biomedical Sciences, College of Medicine, University of Central Florida, Orlando, Florida, USA.

\*For correspondence: Salvador.Almagro-Moreno@Dartmouth.edu

#These authors contributed equally

**Abbreviations:** PG, Phylocore genome; EG, Environmental genome; SNP, Single nucleotide polymorphism; HGT; Horizontal gene transfer; VAP, Virulence adaptive polymorphism; NS, Nonsynonymous; S, Synonymous; FI, Fixation Index

## Abstract

Some microbes can transition from an environmental lifestyle to a pathogenic one<sup>1-3</sup>. This ecological switch typically occurs through the acquisition of horizontally acquired virulence genes<sup>4-7</sup>. However, the genomic features that must be present in a population prior to the acquisition of virulence genes and emergence of pathogenic clones remain unknown. We hypothesized that virulence adaptive polymorphisms (VAPs) circulate in environmental populations and are required for this transition. We developed a comparative genomic framework for identifying VAPs, using *Vibrio cholerae* as a model. We then characterized several environmental VAP alleles to show that one of them reduced the ability of clinical strains to colonize a mammalian host, whereas two other alleles conferred efficient colonization. These results show that VAPs are present in environmental bacterial populations prior to the emergence of virulent clones. We propose a scenario in which VAPs circulate in the environment, they become selected and enriched under certain ecological conditions, and finally a genomic background containing several VAPs acquires virulence factors that allows for its emergence as a pathogenic clone.

# **Main text**

Numerous bacterial pathogens have emerged from environmental populations<sup>1-3</sup>. These virulent clones evolve through the acquisition of toxins and host colonization factors<sup>4-7</sup>. Given that the genes encoding these factors can often spread widely by horizontal gene transfer (HGT), it is surprising that only a limited number of pathogenic clones have emerged from any given bacterial species. As a model of how non-pathogenic gene pools give rise to pandemic clones, we used *Vibrio cholerae*, a genetically diverse group of aquatic bacteria that include a confined phylogenetic group, the phylocore genome (PG), that can cause the severe diarrheal disease cholera in humans<sup>8-11</sup>. Virulence in *V. cholerae* PG is mainly determined by two virulence factors: the cholera toxin (CT) and the toxin-coregulated pilus (TCP), which are encoded within horizontally acquired genetic elements, the CTX $\Phi$  phage and the Vibrio Pathogenicity Island-1 (VPI-1) respectively<sup>12-16</sup>. Both gene clusters are always found in the PG group, however, they are also encoded in some environmental populations of *V. cholerae*<sup>8,9,17-24</sup>. The PG group evolved from a common ancestor and underwent clonal expansion, thus, harboring relatively little genetic diversity other than sporadic swapping of CTX $\Phi$  and O-antigen alleles<sup>8,9</sup>. Seven pandemics of cholera have been recorded to date, all caused by the PG group. The first six pandemics were caused by strains of the classical biotype<sup>10,11</sup>; the current and seventh pandemic is caused by strains of the El Tor biotype, and has spread across the globe in several waves of transmission<sup>25</sup>.

To investigate the evolutionary origins of pandemic clones and the potential for their reemergence, we analyzed 43 *V. cholerae* genomes sequenced from clinical and environmental samples (Methods; Supplementary Table 1). These were divided into a primary dataset of 22 genomes and a replication dataset of 22 genomes (containing additional single nucleotide polymorphisms; SNPs; Supplementary Table 2), with one reference genome in common, MJ-1236. In the primary dataset, we chose 7 PG genomes, including both classical and El Tor, to represent the genetic diversity of the pandemic group. We compared these with 15 non-clinical

environmental genomes (EGs): 10 EGs from worldwide samples to include global diversity, and five sympatric isolates from the Great Bay Estuary (GBE) in New Hampshire, USA, a region with no recent history of cholera outbreaks<sup>26</sup>.

Consistent with the results of previous studies<sup>8,25-27</sup>, PG genomes form a distinct monophyletic group compared to EGs, based on the aligned core genome (Fig. 1a). Other than the PG group, there is little phylogenetic structure and the tree is star-like, with a similar pattern being observed in both the primary and replication datasets (Supplementary Fig. 1). Reticulations in the phylogenetic network indicate homoplastic mutation and/or recombination, consistent with a large, genetically diverse and recombining *V. cholerae* population (Supplementary Fig. 1). In terms of gene content, PGs appear to sample genes at random from the environmental gene pool (Supplementary Fig. 2). In the primary dataset, there are only 12 genes, located in 5 clusters in the genome, present in all 7 PGs and absent in all 15 EGs; these include the major virulence gene clusters CTXΦ and VPI-1 (Supplementary Table 3). However, most of the 12 gene families were represented in both PGs and EGs in the replication dataset. Overall, these results indicate that the PG-specific gene pool is small, and there is extensive gene sharing between EGs and PGs.

Given a frequently recombining *V. cholerae* population<sup>27,28</sup>, the small number of PG-specific genes, and the mobile nature of its virulence factors, it remains puzzling why the ability to cause pandemic cholera is limited to the PG group. Two possible scenarios that could explain this confined distribution are: 1) The acquisition of virulence genes could have triggered a clonal expansion of the first genomic background that acquired them (PG). Other clones that subsequently acquired the virulence genes failed to emerge as global pandemics because that niche had already been filled by PG; 2) The environmental ancestor of PG had a genomic background that rendered them susceptible to becoming virulent by encoding a set of allelic variations – which we term virulence adaptive polymorphisms (VAPs) – endowing them with properties that enhanced their pathogenic potential.

To distinguish between the two scenarios, we first identified SNPs in the aligned core of the 22 primary dataset genomes, with one allele fixed in all PGs and a different allele fixed in all EGs. There are 819 such “fixed” SNPs, of which 714 (87%) fall within genes distributed across the genome (Fig. 1b; Supplementary Fig. 3). Under the first scenario, these SNPs are selectively neutral markers with no impact on virulence. Under the second scenario, at least some of these SNPs would be under selection for increased virulence or host colonization. Using the McDonald-Kreitman test<sup>29</sup>, we found evidence for genome-wide positive selection during the divergence of PG from EGs due to an excess of nonsynonymous changes in both primary and replication datasets, supporting the second scenario and suggesting the existence of VAPs in natural *V. cholerae* populations (Supplementary Table 4). No individual gene showed evidence for selection after correcting for multiple tests (Methods), rendering it difficult to identify VAPs at fixed SNP sites. However, fixed SNPs constitute only a modest fraction of possible SNP patterns (Supplementary Table 2), and VAPs could also exist at other SNP sites. In particular, SNPs with one allele fixed in PGs but with two alleles segregating in EGs could be informative both about pathogen emergence, and about the potential for reemergence (e.g. the extent of virulence adaptive alleles circulating in the environmental gene pool).

To identify specific genomic variants putatively encoded by the environmental ancestor of PG but still segregating in contemporary natural populations of *V. cholerae*, we searched for PG-like alleles present in EGs. Specifically, we defined a “mixed” SNP pattern at sites that were fixed in PGs but polymorphic in EGs. We only considered dimorphic SNP sites, meaning that at least one EG had the same allele fixed in the PGs (Fig. 1c). We identified 39,171 mixed SNPs in the primary dataset, of which 34,348 (88%) fall within genes. Most genes contain few mixed SNPs (median of 3) but some genes contain dense clusters, resulting in a mean of 10.3 mixed SNPs per gene. The replication dataset contained greater genetic diversity, but showed the same pattern (Supplementary Table 2). Clusters of genes containing many mixed SNPs are visible when plotted across the genome (Fig. 1c). Some of these clusters are known

polymorphic regions of the genome, such as the loci encoding the O-antigen and the flagellum. Many of these clusters could be mutation hotspots, containing mutations not directly relevant to virulence adaptation. However, clusters of mixed SNPs do not visibly overlap with clusters of overall polymorphism (Fig. 1c), indicating that accumulation of mixed SNPs cannot be explained only by mutation hotspots.

To formally exclude mutation hotspots and focus on clusters of mixed SNPs likely to be under natural selection, we considered only genes with an excess of nonsynonymous (NS) mixed SNPs relative to synonymous (S) mixed SNPs, which control for the baseline mutation rate. The mixed SNP pattern necessarily groups PG-like EGs away from the other environmental strains and clusters them with the PGs. We reasoned that genes with an elevated NS:S ratio at mixed SNP sites were more likely to show phenotypic variations and have evolved under positive selection, possibly underlying host adaptations of the PG ancestor. Using a threshold of  $\geq 12$  NS mixed SNPs per gene and mixed NS:S > 1.78 (respectively two standard deviations above the genome-wide medians) we identified five genes as candidate VAPs in the primary dataset, three of which survived multiple hypothesis correction, and two of which (*ompU* and hypothetical gene VCD\_001600) were also found in the replication dataset (Table 1). All five genes had NS:S greater than two (the neutral expectation, based on approximately two nonsynonymous sites and one synonymous site per codon), suggesting positive or diversifying selection rather than relaxed purifying selection. In contrast to the star-like genome-wide phylogeny (Fig. 1a), each of these five gene trees support one or more EGs grouping with PGs (Fig. 1d and Supplementary Fig. 4). Three of the gene trees, including the lipid A core O-antigen ligase, support EGs LMA3894-4 and 12129 branching with PGs (Supplementary Table 1 and Supplementary Fig. 4), consistent with these strains being O1-like<sup>8,30</sup>. The O-antigen ligase gene was not identified as a VAP in the replication dataset, which is to be expected given the absence of O1-like EGs in that dataset<sup>27</sup> (Table 1). Three additional

VAPs – all hypothetical proteins – were identified in the replication dataset (Supplementary Table 5).

Among the candidate VAPs, the gene with the most significant excess of mixed NS SNPs in both datasets is *ompU* (Table 1). OmpU is an outer membrane porin that has been shown to play numerous roles in the intestinal colonization of *V. cholerae*, making it a compelling candidate for phenotypic characterization<sup>31-35</sup>. We observed that environmental strains RC385, GBE0658 and GBE0428 cluster near PGs in the *ompU* gene tree, resulting in mixed SNP patterns, and share an 11 amino acid N-terminus insertion with PGs (Supplementary Fig. 5), whereas GBE1114 is part of a separate clade with the rest of the EGs (Fig. 1d). We hypothesized that the PG-like environmental alleles might confer properties conducive to virulence. To test this, we constructed three different mutant strains each encoding one of three environmental alleles of *ompU* into the background of N16961, a clinical strain from the current pandemic (Fig. 2). OmpU was detected on a protein gel stained with Coomassie blue in all the constructed strains, indicating that all the strains effectively produce the environmental versions of the protein (Fig. 2a).

We performed three sets of experiments to compare the phenotypes conferred by EG and PG-like alleles of *ompU*. First, we determined the survival of these strains in the presence of 0.4% bile, as it has been previously shown that OmpU confers resistance to this antimicrobial compound<sup>33</sup>. The mutant strain encoding the *ompU* allele from the environmental strain GBE1114 (OmpU<sup>GBE1114</sup>) had diminished bile tolerance and its survival in the presence of bile is similar to that of a deletion mutant (Fig 2b). In contrast, the mutants encoding the PG-like environmental alleles (OmpU<sup>GBE0658</sup> and OmpU<sup>GBE0428</sup>) show similar survival in the presence of bile as wild-type (Fig. 2b). These experiments indicate that some environmental alleles of *ompU* confer properties beneficial for virulence. Second, we tested the survival of the mutants in the presence of polymyxin B, as OmpU also confers resistance against this antibiotic<sup>31</sup>. The ability to tolerate the antimicrobial effects of polymyxin B appears to be independent of which *ompU*

allele is encoded by *V. cholerae*, as the three strains encoding environmental alleles of *ompU* had a similar survival rate (Fig. 2c). The three mutant strains had a consistent decrease in survival when compared to wild-type; however, the difference was not statistically significant (Fig. 2c). Third, we determined the intestinal colonization of the *ompU* mutants by performing competition assays using the infant mouse model of human infection. We found that OmpU<sup>GBE1114</sup> had a colonization defect similar to  $\Delta ompU$  whereas OmpU<sup>GBE0658</sup> was able to colonize similarly to wild-type (Fig. 2d). These results indicate that certain naturally occurring environmental alleles of *ompU* confer properties that provide an advantage to *V. cholerae* prior to host colonization.

The *ompU*<sup>GBE1114</sup> allele does not appear to be adaptive for intestinal colonization; however, its presence in several environmental isolates of *V. cholerae* prompted us to investigate its possible role in the environment (Fig. 2e). *V. cholerae* forms biofilms on the surface of biotic and abiotic environmental surfaces<sup>24,36-39</sup>. Biofilm formation inside the host is thought to be detrimental for successful intestinal colonization<sup>24,35-37,39,40</sup>. Strains with deletions in *ompU* have been shown to form a more robust biofilm on abiotic surfaces<sup>41</sup>. We found that OmpU<sup>GBE1114</sup> has higher biofilm formation than wild-type, similar to the  $\Delta ompU$  strain (Fig. 2e). Both OmpU<sup>GBE0658</sup> and OmpU<sup>GBE0428</sup> formed biofilm similar to the wild-type strain (Fig. 2e). It therefore appears that there is an evolutionary trade-off between encoding the PG-like or EG-like alleles of VAPs, as they seem to confer mutually exclusive traits. This suggests that environmental strains can be divided into subgroups which, due to their contrasting lifestyles, differ in their potential to become pathogenic.

In summary, we have determined that virulence adaptive polymorphisms are present in the environment, and shown how VAPs can be identified based on two independent sets of genomes. The top candidate VAP, *ompU*, was identified in both of our genomic datasets. However, the more genetically diverse replication dataset yielded three additional candidates

(Supplementary Table 5), suggesting the potential for other VAPs to be identified with further sampling of genetically diverse environmental genomes.

Our data show that the *ompU* allele from some environmental strains, such as GBE0658, confers properties that allow for host colonization equally as efficient as alleles from clinical strains (Fig. 2). This leads to a natural question: Why have environmental strains with PG-like alleles not emerged as pandemic cholera strains? One immediate answer is because they might not encode the key virulence factors CT and TCP. However, CTX $\Phi$  and VPI-1 have been found in environmental *V. cholerae* strains that do not cause disease in humans<sup>8,9,17-24</sup>. It therefore appears that a variety of virulence adaptive alleles are circulating in the environment, but only the PG group encodes the optimal combination of VAPs that allowed for emergent virulent properties and pandemic potential (Fig. 3). We propose a conceptual model in which VAPs circulate in a diverse, recombining environmental gene pool, being maintained in the population through various biotic and abiotic selective pressures (Fig. 3a). A new ecological opportunity occurs, such as human consumption of brackish water or transient colonization of other animal hosts, which leads to the proliferation and gradual enrichment in the population of clones encoding a mosaic of VAPs (Fig. 3b). Finally, a genome encoding a critical combination of VAPs acquires key virulence factors allowing it to emerge as a virulent, potentially pandemic clone (Fig. 3c).

Our model posits that VAPs are circulating in the environment prior to the acquisition of key virulence factors. This is based on experimental evidence that a current pandemic strain, N16961, which encodes the key virulence factors CT and TCP, cannot efficiently colonize the mammalian intestine without a PG-like *ompU* allele. If virulence adaptive alleles of *ompU* are indeed required prior to the acquisition of virulence factors, we would expect the same phenotypes of PG-like and EG-like *ompU* alleles in the genomic background of a more deeply branching PG isolate, such as classical *V. cholerae*, the cause of the first six cholera pandemics. Indeed, we found that PG-like *ompU* alleles in the O395 background conferred

efficient host colonization (Supplementary Fig. 6), which is consistent with an *ompU* VAP having played a role in the emergence of pathogenic *V. cholerae* prior to the acquisition of key virulence factors.

Our model further posits that virulence-adaptive alleles become enriched in the environmental population. Such enrichment would be made possible if these alleles provided a selective advantage in a newly available ecological niche, such as a human population consuming brackish water<sup>3</sup>. In previous work, we modeled an evolving, recombining microbial population that encounters a new ecological opportunity<sup>42</sup>. When adaptation to the new niche depends on few loci, it is more likely for recombination to assemble the right combination of alleles in the same genome before. As more loci are involved, it becomes less likely to achieve the optimal combination. Assuming the *V. cholerae* population undergoes approximately 100 recombination events per locus per generation<sup>28</sup>, equivalent to a recombination rate of  $10^{-4}$  in the modelled population of size  $10^6$ , an optimal combination of alleles at five loci could conceivably evolve, but seven loci is very unlikely<sup>42</sup>. Therefore, if virulence depended on five loci in the *V. cholerae* genome, the optimal combination of alleles would be expected to appear repeatedly in nature. Given suitable ecological opportunities, it is then plausible that pandemic *V. cholerae* could emerge multiple times, originating from outside the PG group. However, the number of loci that are sufficient for the emergence of a virulent strain remains unknown and if it was much greater than five, excluding horizontally acquired elements, pathogen emergence would be naturally limited. Coincidentally, we identified between five and eight candidate VAPs in our two datasets. However, these passed stringent filters and we suspect there might exist additional VAPs in the genome, identifiable by further sampling and experimentation. We also note that LMA3894-4, a PG-like environmental strain containing PG-like alleles at three out of five candidate VAP loci (Supplementary Fig. 4), does not contain a predicted *ompU* ortholog, suggesting a colonization-impaired phenotype. Similarly, strain 12129 also contains PG-like alleles at these VAP loci, but has an EG-like allele of *ompU* (Fig 1D). Therefore, no genome

other than PGs contains a clinical-like combination of VAPs, due either to recombination or selection limitation.

Here we have described a framework for identifying loci that are present in a natural population and confer properties beneficial for virulence prior to acquisition of essential virulence genes and host colonization. This framework could be applied to other bacterial pathogens that emerge as clonal offshoots from non-virulent relatives, including *Yersinia*, *Salmonella*, and *Escherichia*, among others<sup>1,6,7</sup>. Pathogens that emerged through clonal expansion limit our ability to dissect the genetic basis of their pathogenicity, because bacterial genome-wide association studies lack power when the phenotype of interest has evolved only once<sup>43</sup>. Our framework therefore provides a way forward to identify the genetic basis of virulence, even in pathogens that evolved through clonal expansion, and begin to assess the risk of pathogen emergence and reemergence from environmental gene pools.

## Methods

**Genome sequencing.** DNA from clinical isolates (Bgd1, Bgd5, Bgd8, MQ1795) and environmental isolates (GBE0428, GBE0658, GBE1068, GBE1114, GBE1173) was extracted using the Gentra kit (QIAGEN) and purified using the MoBio PowerClean Pro DNA Clean-Up Kit. Multiplexed genomic libraries were constructed using the Illumina-compatible Nextera DNA Sample Prep kit following the manufacturer's instructions. Sequencing was performed with 250-bp paired-end (v2 kit) reads on the illumina MiSeq.

**Genome assembly.** To exclude low-quality data, raw reads were filtered with Trimmomatic<sup>44</sup>. The 15 first bases of each reads were trimmed and reads containing at least one base with a quality score of <30 were removed. *De novo* assembly was performed on resulting reads using Ray v2.3.1<sup>45</sup>.

**Genome alignment, annotation and SNP calling.** We used mugsy v.1 r.2.2<sup>46</sup> with default parameters to align the primary dataset of 22 *V. cholerae* genomes (Supplementary Table 1). From this alignment, we extracted dimorphic SNP sites and annotated genes according to MJ-1236 as a reference genome. We replicated the alignment, annotation and SNP calling using 21 different *V. cholerae* genomes from Orata *et al.*<sup>27</sup> (plus the MJ-1236 reference, for a total of 22), consisting of 15 environmental genomes (EGs: 1587, AM19226, MZ03, MZO2, V51, YB1A01, YB1G06, YB2G01, YB3B05, YB4B03, YB4C07, YB4G05, YB4H02, YB5A06, YB7A09) and 7 phylocore genomes (PGs: 2010EL, 274080, BX330286, MAK757, MO10, V52, MJ-1236).

**Definition of orthologous groups.** Genomes were annotated using the RAST web server ([www.rast.nmpdr.org](http://www.rast.nmpdr.org))<sup>47</sup>. Annotated genes were clustered into orthologous groups using OrthoMCL ([www.orthomcl.org](http://www.orthomcl.org))<sup>48</sup> with default parameters, yielding 2844 orthologous groups.

**Phylogenetic analysis.** We constructed a core genome phylogeny using the concatenated alignment of 1031 single-copy orthologous protein-coding genes (present in exactly one copy in each of the 22 primary dataset genomes). Each protein sequence was aligned with Muscle<sup>49</sup>, and the concatenated alignment was used to infer an approximate maximum likelihood phylogeny with FastTree v. 2.1.8<sup>50</sup> using default parameters (Fig. 1a). Individual gene trees (Fig. 1d) were built in the same way. We constructed a neighbour-net of the 22 genomes using SplitsTree v.4.10<sup>51</sup>, based on dimorphic SNPs from the mugsy genome alignment, excluding sites with gaps.

**Tests for selection.** We conducted a genome-wide version of the McDonald-Kreitman test<sup>29</sup> by first counting the number of fixed nonsynonymous (fn), fixed synonymous (fs), polymorphic nonsynonymous (pn), and polymorphic synonymous (ps) sites within each gene. We then summed these values across all genes (FN, FS, PN, and PS) and calculated the genome-wide Fixation Index,  $FI = (FN/FS)/(PN/PS)$ . A fixation index greater than one suggests positive selection between the ingroup and outgroup (in this case, between EGs and PGs). However, care must be taken when computing a genome-wide FI because summing genes with different amounts of substitutions and polymorphism can result in  $FI > 1$  in the absence of selection<sup>52</sup>. We therefore performed 1000 permutations of the data, keeping the row totals (fn+fs and pn+ps) and column totals (fn+pn and fs+ps) constant and recomputing FI. We used the mean FI from the permutations as the expected value of FI under neutral evolution. To evaluate the hypothesis that the observed FI was higher than expected, suggesting positive selection, we computed a *P*-value as the fraction of permutations with FI greater or equal to the observed FI. We repeated the test using polymorphism from either the PG group or the EG group (Supplementary Table 3).

To identify individual genes under selection between PGs and EGs in the primary dataset, we restricted our search to 87 genes with  $fn > 0.68$  and  $fn:fs > 1.48$  (respectively two

standard deviations about the genome-wide medians). We then calculated the gene-specific FI and assessed its significance with a Fisher exact test. We found no genes with FI significantly greater than one, after Bonferroni correction for 87 tests. Similarly, in the replication dataset, we restricted our search to 26 genes with  $fn > 1.5$  and  $fn:fs > 1.70$ , none of which had significantly high FI after correction for multiple tests.

To identify genes with an excess of nonsynonymous mixed SNPs (likely due to selection for amino acid changes), we restricted our search to five genes with  $\geq 12$  NS mixed SNPs per gene and mixed NS:S  $> 1.78$  (respectively two standard deviations above the genome-wide medians). We used a binomial test to assess whether the observed NS:S ratio for each gene was significantly greater than the genome-wide median NS:S ratio of 0.5 (after adding a pseudocount of one to both NS and S). Three out of the five genes had a significantly high mixed NS:S ratio ( $P < 0.05$ ) after Bonferroni correction for five tests (Table 1). We repeated this procedure in the replication dataset, identifying genes with  $\geq 18$  NS mixed SNPs per gene and mixed NS:S  $> 1.65$  (respectively two standard deviations above the genome-wide medians). We used a binomial test to assess whether the observed NS:S ratio for each gene was significantly greater than the genome-wide median NS:S ratio of 0.33 (after adding a pseudocount of one to both NS and S). The results of these tests are shown for genes also identified in the primary dataset (Table 1) and three additional genes identified in the replication dataset (Supplementary Table 5).

**Bacterial strains and plasmids.** *V. cholerae* O395 and *V. cholerae* N16961 were used as wild-type strains of classical and El Tor biotypes respectively. Strains cultivated on solid medium were grown on LB agar; strains in liquid media were grown in aerated LB broth at 37°C. pKAS154 was used for allelic exchange<sup>53</sup>. When necessary, media was supplemented with antibiotics to select for certain plasmids or strains of *V. cholerae* at the following concentrations: gentamycin, 30µg/ml; kanamycin, 45µg/ml; polymyxin B, 50µg/ml; and streptomycin, 1 mg/ml.

327

328 **Strain construction.** In-frame deletions of genes of interest were constructed via homologous  
 329 recombination. PCR was used to amplify two approximately 500 bp fragments flanking the gene  
 330 and to introduce restriction sites. For exchange of environmental alleles the respective *ompU*  
 331 gene was also amplified and restriction sites introduced. The fragments were then cloned into a  
 332 restriction-digested plasmid using a three-segment ligation for in-frame deletion mutants and a  
 333 four-segment ligation for environmental allele exchange mutants. The resulting plasmid was  
 334 electroporated into *Escherichia coli* S17-1 $\lambda$ pir. *E. coli* with the constructed plasmid was mated  
 335 with wild-type *V. cholerae* O395 or N16961, and allelic exchange was carried out by selection  
 336 on antibiotics, as described previously<sup>53</sup>. Potential mutants were screened using PCR: two  
 337 primers flanking the deletion construct were used to amplify chromosomal DNA isolated from  
 338 plated *V. cholerae*. The lengths of the PCR fragments were analyzed on 0.8% agarose gel for  
 339 gene deletions and putative deletions were subsequently confirmed by DNA sequencing.

340

341 **Protein electrophoresis and OmpU visualization.** Whole cell protein extracts were prepared  
 342 from cultures grown for overnight at 37°C in a rotary shaker. The extracts were subjected to  
 343 SDS-PAGE on 16% Tris Glycine gels (Invitrogen). OmpU bands were visualized after protein  
 344 gels were stained by Coomassie blue overnight.

345

346 **Survival assays.** *V. cholerae* strains were cultured overnight in LB broth at 37°C in a rotary  
 347 shaker. Overnight cultures were diluted 1:100 in LB and grown to an OD600 of 0.5. Cells were  
 348 pelleted and resuspended in either LB broth, LB containing 0.4% bile bovine (Sigma), or LB  
 349 containing 1000U/ml of polymyxin B (Sigma). Cultures were incubated for 1h at 37°C in a rotary  
 350 shaker. After incubation CFU/ml of each culture was calculated by plating dilutions in LB plates.

Survival was calculated by comparing the number of CFU/ml in LB plus treatment versus LB.

N≥6.

**Infant mouse competition assays.** Overnight cultures were diluted 1:100. Each test strain was mixed in a 1:1 ratio with a  $\Delta$ lacZ reference strain. Four- to 5-day-old CD-1 mice were inoculated orogastrically with 50µl of the bacterial mixture. The intestines were harvested 24h post-inoculation and homogenized in 4ml of LB broth containing 10% glycerol. The mixtures were serially diluted and plated on LB agar plates supplemented with streptomycin and 5-bromo-4-chloro-3-indolyl-D-galactopyramoside (X-Gal) (40µg/ml). The competition indices were calculated as previously described by others, test (output CFUs/input CFUs)/reference (output CFUs/ input CFUs).

**Biofilm assays.** 96-well plate assay. Cultures were incubated overnight at 30°C. 100µl of 1:100 dilutions of overnight cultures were placed per well in 96-well plates. Plates were left at 25°C for 24h. Liquid contents were discarded and plates were washed 2 times with LB. 200µl of 0.01% crystal violet was added per well and incubated at room temperature for 5 minutes. Liquid contents were discarded and plates were washed extensively with dH<sub>2</sub>O. After the plates were dry, biofilms were resuspended in 150µl of 50% acetic acid. Contents were transferred to a flat bottom dish and quantitated in a microtiter plate reader at OD550. Values were plotted using Prism software. N=15.

# References

1. McNally, A., Thomson, N. R., Reuter, S. & Wren, B. W. 'Add, stir and reduce': *Yersinia* spp. as model bacteria for pathogen evolution. *Nat. Rev. Microbiol.* **14**, 177–190 (2016).
2. Luo, C. *et al.* Genome sequencing of environmental *Escherichia coli* expands understanding of the ecology and speciation of the model bacterial species. *Proc. Natl. Acad. Sci. USA* **108**, 7200–7205 (2011).
3. Boucher, Y., Orata, F. D. & Alam, M. The out-of-the-delta hypothesis: dense human populations in low-lying river deltas served as agents for the evolution of a deadly pathogen. *Front. Microbiol.* **6**, L19401 (2015).
4. Ochman, H., Lawrence, J. G. & Groisman, E. A. Lateral gene transfer and the nature of bacterial innovation. *Nature* **405**, 299–304 (2000).
5. Shapiro, B. J. How clonal are bacteria over time? *Curr. Opin. Microbiol.* **31**, 116–123 (2016).
6. Groisman, E. A. & Ochman, H. Pathogenicity Islands: Bacterial Evolution in Quantum Leaps. *Cell* **87**, 791–794 (1996).
7. Ochman, H. Genes Lost and Genes Found: Evolution of Bacterial Pathogenesis and Symbiosis. *Science* **292**, 1096–1099 (2001).
8. Chun, J. *et al.* Comparative genomics reveals mechanism for short-term and long-term clonal transitions in pandemic *Vibrio cholerae*. *Proc. Natl. Acad. Sci. USA* **106**, 15442–15447 (2009).
9. Faruque, S. M. & Mekalanos, J. J. Pathogenicity islands and phages in *Vibrio cholerae* evolution. *Trends Microbiol.* **11**, 505–510 (2003).
10. Kaper, J. B., Morris, J. G. & Levine, M. M. Cholera. *Clin. Microbiol. Rev.* **8**, 48–86 (1995).
11. Harris, J. B., LaRocque, R. C., Qadri, F., Ryan, E. T. & Calderwood, S. B. Cholera. *Lancet* **379**, 2466–2476 (2012).
12. De, S. N., Bhattacharya, K. & Sarkar, J. K. A study of the pathogenicity of strains of *Bacterium coli* from acute and chronic enteritis. *J. Pathol. Bacteriol.* **71**, 201–209 (1956).
13. Taylor, R. K., Miller, V. L., Furlong, D. B. & Mekalanos, J. J. Use of *phoA* gene fusions to identify a pilus colonization factor coordinately regulated with cholera toxin. *Proc. Natl. Acad. Sci. U.S.A.* **84**, 2833–2837 (1987).
14. Waldor, M. K. & Mekalanos, J. J. Lysogenic conversion by a filamentous phage encoding cholera toxin. *Science* **272**, 1910–1914 (1996).
15. Karaolis, D. K. *et al.* A *Vibrio cholerae* pathogenicity island associated with epidemic and pandemic strains. *Proc. Natl. Acad. Sci. U.S.A.* **95**, 3134–3139 (1998).
16. Almagro-Moreno, S., Murphy, R. A. & Boyd, E. F. How Genomics Has Shaped Our Understanding of the Evolution and Emergence of Pathogenic *Vibrio cholerae*. In *Genomes of Foodborne and Waterborne Pathogens* 85–99 (ASM Press, 2011).
17. Faruque, S. M. *et al.* Analysis of clinical and environmental strains of nontoxigenic *Vibrio cholerae* for susceptibility to CTXPhi: molecular basis for origination of new strains with epidemic potential. *Infect. Immun.* **66**, 5819–5825 (1998).
18. Rahman, M. H. *et al.* Distribution of genes for virulence and ecological fitness among diverse *Vibrio cholerae* population in a cholera endemic area: tracking the evolution of pathogenic strains. *DNA Cell Biol.* **27**, 347–355 (2008).
19. Faruque, S. M. *et al.* Genetic diversity and virulence potential of environmental *Vibrio cholerae* population in a cholera-endemic area. *Proc. Natl. Acad. Sci. U.S.A.* **101**, 2123–2128 (2004).
20. Chakraborty, S. *et al.* Virulence genes in environmental strains of *Vibrio cholerae*. *Appl. Environ. Microbiol.* **66**, 4022–4028 (2000).
21. Rivera, I. N., Chun, J., Huq, A., Sack, R. B. & Colwell, R. R. Genotypes associated with virulence in environmental isolates of *Vibrio cholerae*. *Appl. Environ. Microbiol.* **67**, 2421–2429 (2001).
22. Mukhopadhyay, A. K., Chakraborty, S., Takeda, Y., Nair, G. B. & Berg, D. E. Characterization of VPI pathogenicity island and CTXphi prophage in environmental strains of *Vibrio cholerae*. *J. Bacteriol.* **183**, 4737–4746 (2001).
23. Gennari, M., Ghidini, V. & Lleo, M. M. Virulence genes and pathogenicity islands in environmental *Vibrio* strains non-pathogenic to humans. *FEMS Microbiol. Ecol.* **82**, 563–573 (2012).
24. Almagro-Moreno, S. & Taylor, R. K. Cholera: Environmental Reservoirs and Impact on Disease Transmission. *Microbiol. Spect.* **1**, 149–165 (2013).
25. Mutreja, A. *et al.* Evidence for several waves of global transmission in the seventh cholera pandemic. *Nature* **477**, 462–465 (2011).
26. Schuster, B. M. *et al.* Ecology and genetic structure of a northern temperate *Vibrio cholerae* population related to toxigenic isolates. *Appl. Environ. Microbiol.* **77**, 7568–7575 (2011).
27. Orata, F. D. *et al.* The dynamics of genetic interactions between *Vibrio metoecus* and *Vibrio cholerae*, two close relatives co-occurring in the environment. *Genome Biol. Evo.* **7**, 2941–2954 (2015).
28. Keymer, D. P. & Boehm, A. B. Recombination shapes the structure of an environmental *Vibrio cholerae* population. *Appl. Environ. Microbiol.* **77**, 537–544 (2011).

29. McDonald, J. H. & Kreitman, M. Adaptive protein evolution at the Adh locus in *Drosophila*. *Nature* **351**, 652–654 (1991).
30. Pérez Chaparro, P. J. *et al.* Whole genome sequencing of environmental *Vibrio cholerae* O1 from 10 nanograms of DNA using short reads. *J. Microbiol. Methods* **87**, 208–212 (2011).
31. Mathur, J. & Waldor, M. K. The *Vibrio cholerae* ToxR-regulated porin OmpU confers resistance to antimicrobial peptides. *Infect. Immun.* **72**, 3577–3583 (2004).
32. Provenzano, D., Lauriano, C. M. & Klose, K. E. Characterization of the role of the ToxR-modulated outer membrane porins OmpU and OmpT in *Vibrio cholerae* virulence. *J. Bacteriol.* **183**, 3652–3662 (2001).
33. Provenzano, D., Schuhmacher, D. A., Barker, J. L. & Klose, K. E. The virulence regulatory protein ToxR mediates enhanced bile resistance in *Vibrio cholerae* and other pathogenic *Vibrio* species. *Infect. Immun.* **68**, 1491–1497 (2000).
34. Merrell, D. S., Bailey, C., Kaper, J. B. & Camilli, A. The ToxR-mediated organic acid tolerance response of *Vibrio cholerae* requires OmpU. *J. Bacteriol.* **183**, 2746–2754 (2001).
35. Almagro-Moreno, S., Pruss, K. & Taylor, R. K. Intestinal colonization dynamics of *Vibrio cholerae*. *PLoS Pathog.* **11**, e1004787 (2015).
36. Yildiz, F. H. & Schoolnik, G. K. *Vibrio cholerae* O1 El Tor: identification of a gene cluster required for the rugose colony type, exopolysaccharide production, chlorine resistance, and biofilm formation. *Proc. Natl. Acad. Sci. U.S.A.* **96**, 4028–4033 (1999).
37. Watnick, P. I., Fullner, K. J. & Kolter, R. A role for the mannose-sensitive hemagglutinin in biofilm formation by *Vibrio cholerae* El Tor. *J. Bacteriol.* **181**, 3606–3609 (1999).
38. Watnick, P. I. & Kolter, R. Steps in the development of a *Vibrio cholerae* El Tor biofilm. *Mol. Microbiol.* **34**, 586–595 (1999).
39. Marsh, J. W. & Taylor, R. K. Genetic and transcriptional analyses of the *Vibrio cholerae* mannose-sensitive hemagglutinin type 4 pilus gene locus. *J. Bacteriol.* **181**, 1110–1117 (1999).
40. Hsiao, A., Liu, Z., Joelsson, A. & Zhu, J. *Vibrio cholerae* virulence regulator-coordinated evasion of host immunity. *Proc. Natl. Acad. Sci. USA* **103**, 14542–14547 (2006).
41. Valeru, S. P., Wai, S. N., Saeed, A., Sandström, G. & Abd, H. ToxR of *Vibrio cholerae* affects biofilm, rugosity and survival with *Acanthamoeba castellanii*. *BMC Res. Notes* **5**, 33 (2012).
42. Friedman, J., Alm, E. J. & Shapiro, B. J. Sympatric Speciation: When Is It Possible in Bacteria? *PLoS ONE* **8**, e53539 (2013).
43. Chen, P. E. & Shapiro, B. J. The advent of genome-wide association studies for bacteria. *Curr. Opin. Microbiol.* **25**, 17–24 (2015).
44. Bolger, A. M., Lohse, M. & Usadel, B. Trimmomatic: a flexible trimmer for Illumina sequence data. *Bioinformatics* **30**, 2114–2120 (2014).
45. Boisvert, S., Raymond, F., Godzaridis, É., Laviolette, F. & Corbeil, J. Ray Meta: scalable de novo metagenome assembly and profiling. *Genome Biol.* **13**, R122 (2012).
46. Samuel V Angiuoli, S. L. S. Mugsy: fast multiple alignment of closely related whole genomes. *Bioinformatics* **27**, 334–342 (2011).
47. Aziz, R. K. *et al.* The RAST Server: Rapid Annotations using Subsystems Technology. *BMC Genomics* **9**, 1 (2008).
48. Li, L., Stoeckert, C. J. & Roos, D. S. OrthoMCL: identification of ortholog groups for eukaryotic genomes. *Genome Res.* **13**, 2178–2189 (2003).
49. Edgar, R. C. MUSCLE: multiple sequence alignment with high accuracy and high throughput. *Nucleic Acids Res.* **32**, 1792–1797 (2004).
50. Price, M. N., Dehal, P. S. & Arkin, A. P. FastTree 2 – Approximately Maximum-Likelihood Trees for Large Alignments. *PLoS ONE* **5**, e9490 (2010).
51. Bryant, D. & Moulton, V. Neighbor-net: an agglomerative method for the construction of phylogenetic networks. *Mol. Biol. Evol.* **21**, 255–265 (2004).
52. Shapiro, J. A. *et al.* Adaptive genic evolution in the *Drosophila* genomes. *Proc. Natl. Acad. Sci. U.S.A.* **104**, 2271–2276 (2007).
53. Skrupski, K. & Taylor, R. K. Positive selection vectors for allelic exchange. *Gene* **169**, 47–52 (1996).
54. Son, M.S., Megli, C.J., Kovacicova, G., Qadri, F. & Taylor, R.K. Characterization of *Vibrio cholerae* O1 El Tor Biotype Variant Clinical Isolates from Bangladesh and Haiti, including a Molecular Genetic Analysis of Virulence Genes. *J Clinical Microbiology.* **49**, 3739–3749 (2011).

## Acknowledgements

The authors would like to thank Otto Cordero, Yves Terrat and Nicolas Tromas for constructive comments on the manuscript. We also thank Lawrence Shelven for his highly valuable technical assistance. BJS was supported by a Canada Research Chair and the Canadian Institutes for Health Research. RKT was supported by a National Institutes of Health grants AI039654 and AI025096. SAM was supported by startup funds from the Burnett School of Biomedical Sciences at the University of Central Florida and Dartmouth College's E. E. Just Postdoctoral Fellowship.

## 495 Figures

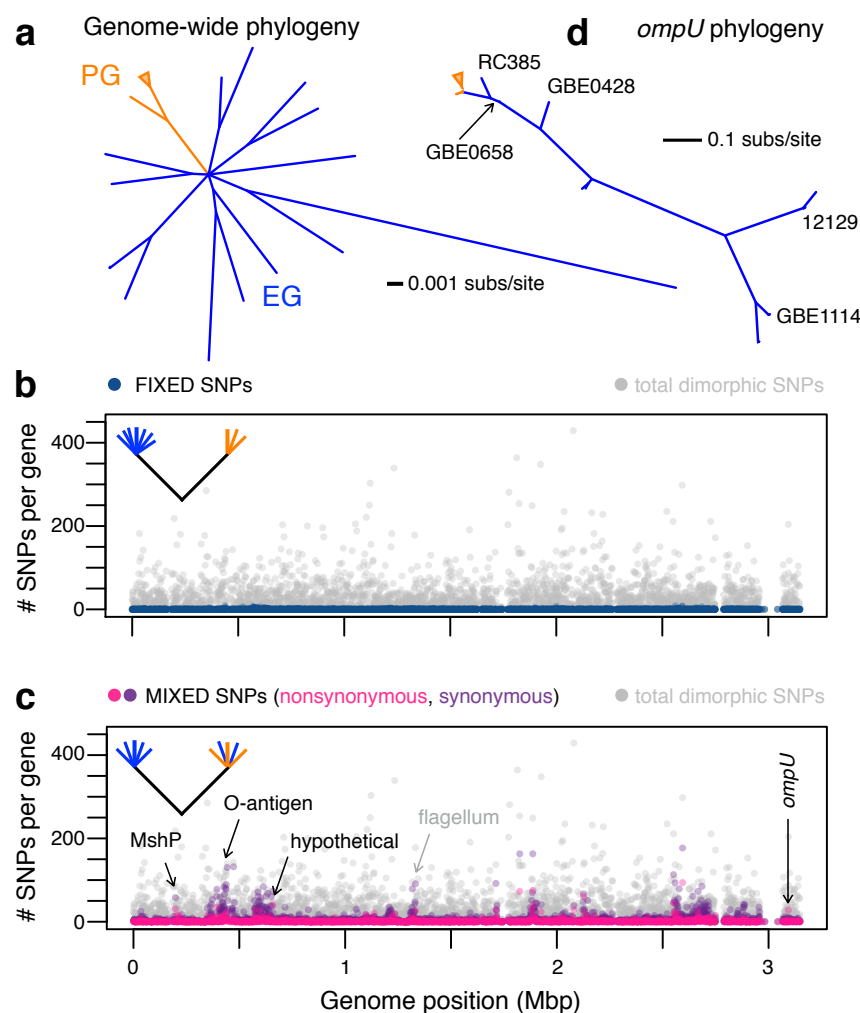

496

### 497 **Figure 1. Comparative genomics reveals candidate virulence adaptive polymorphisms.**

498 **a**, Phylogeny of 22 *V. cholerae* genomes based on 1031 single-copy orthologs in the primary dataset. All  
499 branches have local support values >0.99 except for very short, deep internal branches (resulting in the  
500 star-like polytomy at the centre of the tree). Not all 22 genomes are visible because some have nearly  
501 identical sequences (e.g. 6 of the 7 PG genomes are nearly identical, shown as an orange triangle;  
502 GBE1173 and GBE1114 are nearly identical, as can be seen in Supplementary Figure 1). **b**, Distribution  
503 of fixed SNPs across chromosome 1. (See Supplementary Fig. 3 for chromosome 2). Genome position is  
504 according to the MJ-1236 reference genome. SNP-free regions (e.g. near 3 Mbp, the locus of the  
505 integrative conjugative element) are part of the flexible genome, present in the reference but not the other  
506 21 genomes. The schematic tree in the top left illustrates the fixed SNP pattern, in which one allele is  
507 present in PGs and a different allele in EGs. **c**, Distribution of mixed SNPs across the genome. The  
508 cartoon tree in the top left illustrates the mixed SNP pattern, in which one allele is fixed in PGs, and  
509 another allele is polymorphic among EGs, with some EGs containing the PG-like allele. Black arrows  
510 show candidate VAPs (Table 1). Grey arrow shows the flagellum as an example variable region not  
511 containing candidate VAPs. **d**, *ompU* phylogeny. All visible branches have local support values >0.9  
512 except for the branch separating RC385 and GBE0658, the branch grouping MJ-1236 and O395  
513 together, and the branch grouping HE09 and VL426 together.

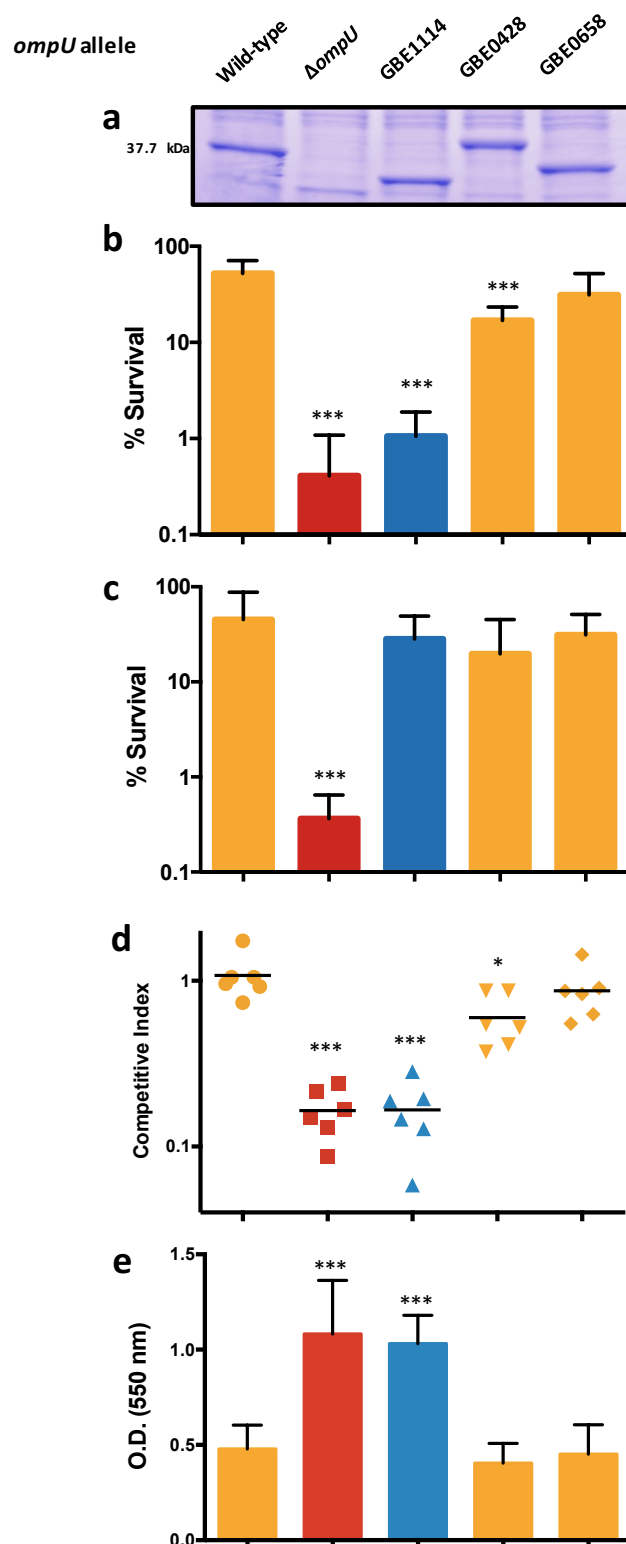

**Figure 2. Phenotypic characterization of *ompU* alleles.** **a**, OmpU production in clinical strains of *V. cholerae* encoding environmental alleles of *ompU*. Total protein lysates were run on a 16% Tris-glycine gel. OmpU bands were visualized after protein gels were stained with Coomassie blue. **b**, Survival of *ompU* mutants in the presence of bile or **c**, polymyxin B. **d**, Colonization of the small intestine of *ompU* mutant strains. **e**, Biofilm formation of *ompU* mutant strains on an abiotic surface. Yellow bars and symbols, PG-like allele; red bars and squares,  $\Delta ompU$ ; blue bars and triangles, EG-like allele. Statistical comparisons were made using student's *t*-test. \* $P < 0.05$ , \*\*\* $P < 0.001$ .

# Figure 3

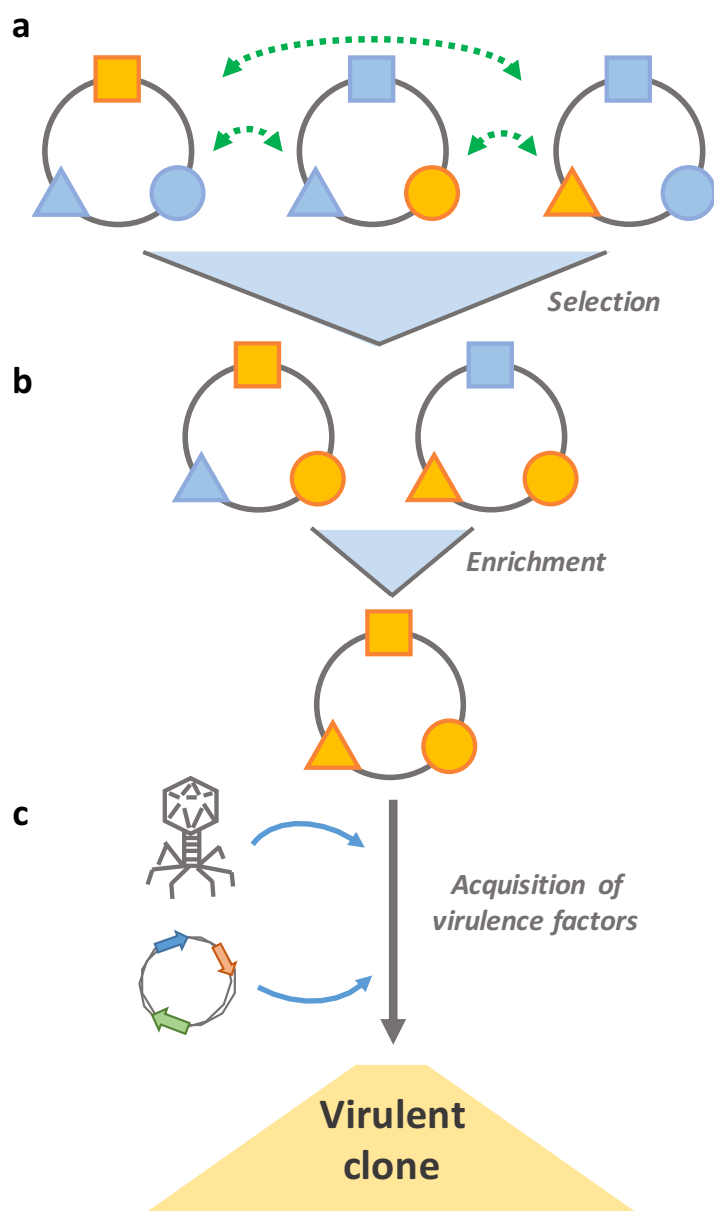

**Figure 3. Model of pandemic clone emergence from an environmental gene pool.** We propose a model that involves three events required for the emergence of pathogenic clones from environmental populations. **a**, selection of VAPs. Virulence adaptive alleles circulate in naturally occurring populations (orange symbols) and can be exchanged and mobilized through recombination (green dashed arrows). Ecological events (temperature, nutrient availability, pH, etc.) lead to the selection of VAPs and an increase in their distribution in environmental populations. **b**, enrichment of clones. A new ecological opportunity occurs (human consumption of untreated waters, transient colonization of new environmental hosts, etc.) which leads to the proliferation and enrichment in the population of clones encoding a mosaic of VAPs. **c**, acquisition of virulence factors. A strain encoding a minimum set of VAPs required for host colonization acquires the virulence factors that are necessary to produce a successful infection and subsequently undergoes intra-host evolution and expansion.

# Tables

**Table 1. Characteristics of five predicted VAPs with an excess of nonsynonymous mixed SNPs.**

| Gene ID (VCD #) | Annotation                    | Gene length (bp) | Total # SNPs | Fixed NS | Fixed S | Mixed NS | Mixed S | P                  |
|-----------------|-------------------------------|------------------|--------------|----------|---------|----------|---------|--------------------|
| 1 003778        | outer membrane protein OmpU   | 1053             | 204 (110)    | 0 (0)    | 0 (0)   | 28 (13)  | 11 (8)  | 0.0047* (0.0068*)  |
| 2 001600        | hypothetical                  | 258              | 21 (26)      | 0 (0)    | 1 (1)   | 15 (22)  | 4 (3)   | 0.0096* (2.32e-8*) |
| 3 001013        | hypothetical                  | 642              | 19 (13)      | 0 (0)    | 0 (0)   | 15 (2)   | 4 (1)   | 0.0096* (n.s.)     |
| 4 001209        | MSHA biogenesis protein MshP  | 432              | 85 (63)      | 0 (0)    | 0 (0)   | 14 (7)   | 4 (5)   | 0.0154 (0.066)     |
| 5 001230        | lipid A core O-antigen ligase | 1794             | 75 (47)      | 0 (0)    | 0 (1)   | 12 (0)   | 5 (1)   | 0.0717 (n.s.)      |

NS=nonsynonymous; S=synonymous. The genes listed have mixed NS and mixed NS:S both over two standard deviations above the genome-wide median in the primary dataset. A binomial test determined if the mixed NS:S ratio was greater than the expected genome-wide median value of 0.5 per gene (uncorrected *P*-values shown; asterisks (\*) indicate *P* < 0.05 after Bonferroni correction for five tests). Numbers in parentheses are for the replication dataset, with an expected genome-wide median mixed N:S of 0.33. *P*-values greater than 0.1 are denoted as not significant (n.s.). Genes 1, 2, 4, and 5 are indicated with arrows on Figure 1C. Gene 3 is on chromosome 2 (Supplementary Figure 3).

Supplementary Figures

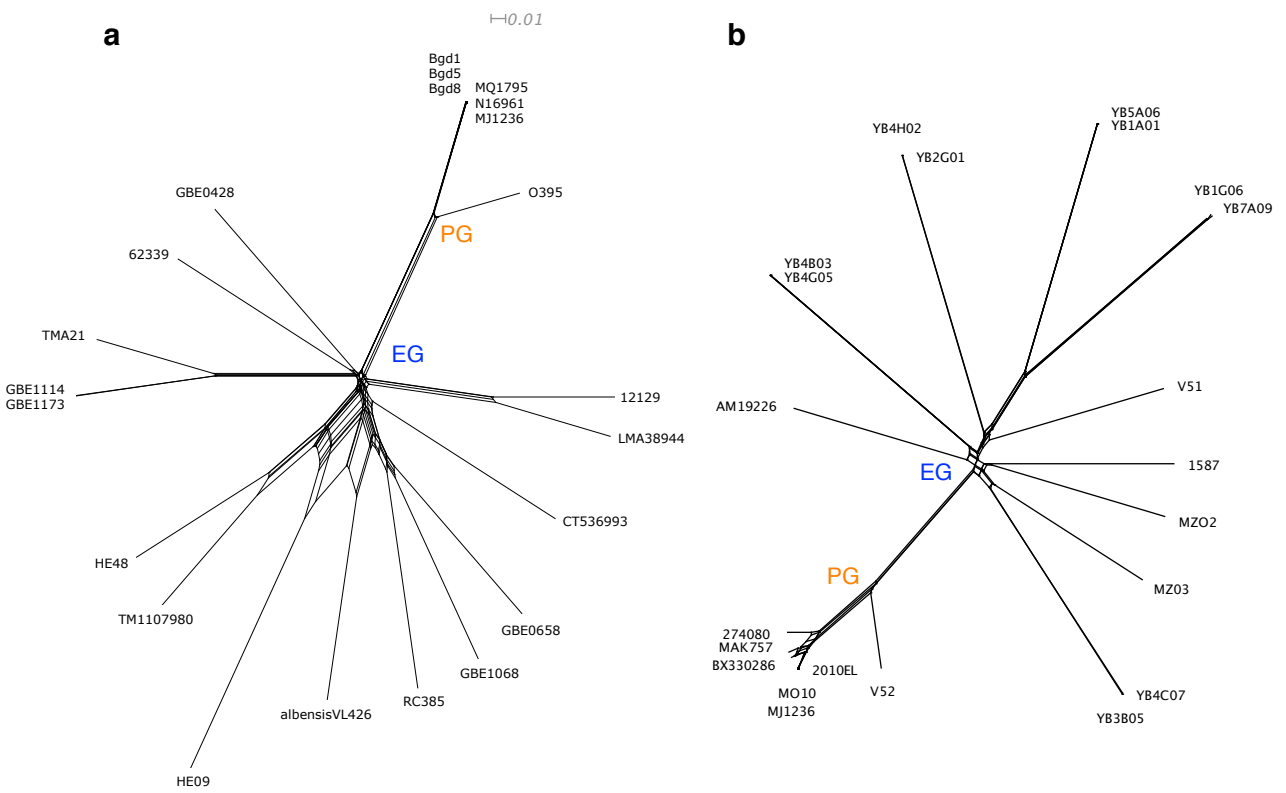

**Supplementary Figure 1. Splittree showing relationship of environmental (EG) and pandemic (PG) *V. cholerae* genomes.** **a**, The neighbour-net is based on dimorphic sites in the alignment of 22 genomes in the primary dataset, excluding sites with gaps. Only alignment blocks (locally colinear blocks produced by mugsy) including all 22 genomes were included, yielding 126,099 dimorphic sites. **b**, The neighbour-net based on 142,797 dimorphic sites in an alignment of 22 different genomes in the replication dataset (from Orata *et al.*<sup>27</sup>). The general star-like topology remains the same, with PGs clustering closely together at the end of one long branch.

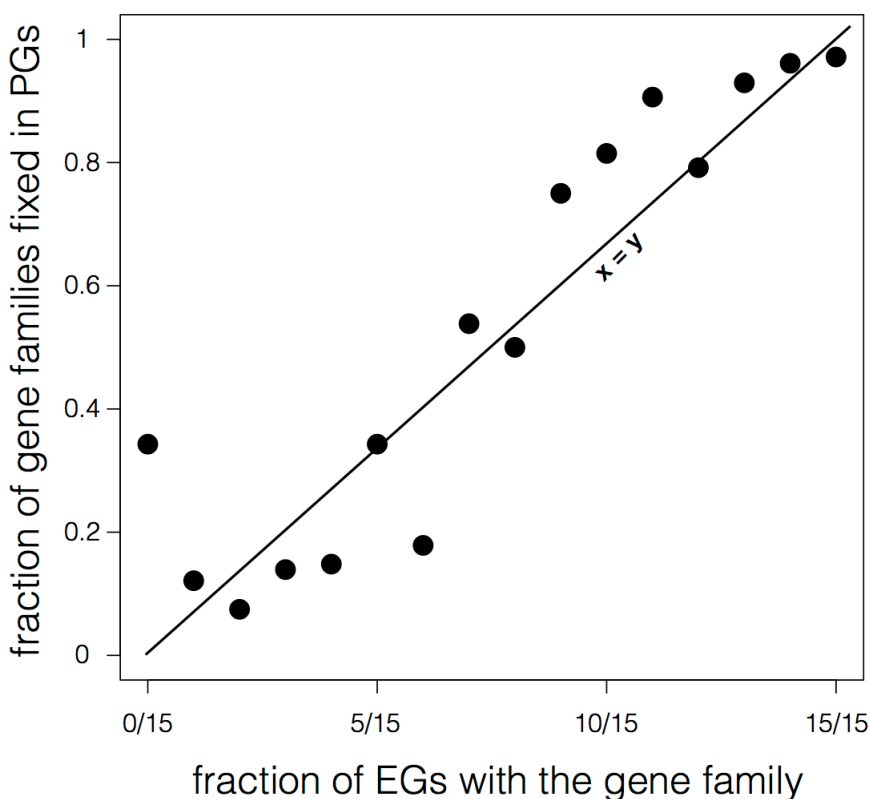

**Supplementary Figure 2. PG strains sample genes randomly from the environmental pool.** Gene families from OrthoMCL were binned by their frequency in environmental genomes (EGs), ranging from being present in zero to all 15 EGs in the primary dataset (x-axis). Within each of these bins, we calculated the fraction of gene families fixed (e.g. present in all seven) phylocore genomes (PGs). For example, the point in the top right includes 1817 gene families present in all 15 EGs, of which 1765 are also present in all seven PGs, yielding a fraction of 0.97 fixed in PGs. The points fall closely along the  $x=y$  line, with an outlier due to an excess of gene families (12 out of 35) fixed in PGs but absent in EGs (present in 0/15 EGs). The observation that the fixation probability (y-axis) scales approximately linearly with gene frequency in the environment (x-axis) suggests that PGs sample genes approximately randomly from the environmental pool. The 12 gene families fixed in PGs but absent in EGs seem to depart from the random expectation, suggesting a role for selection (Supplementary Table 2).

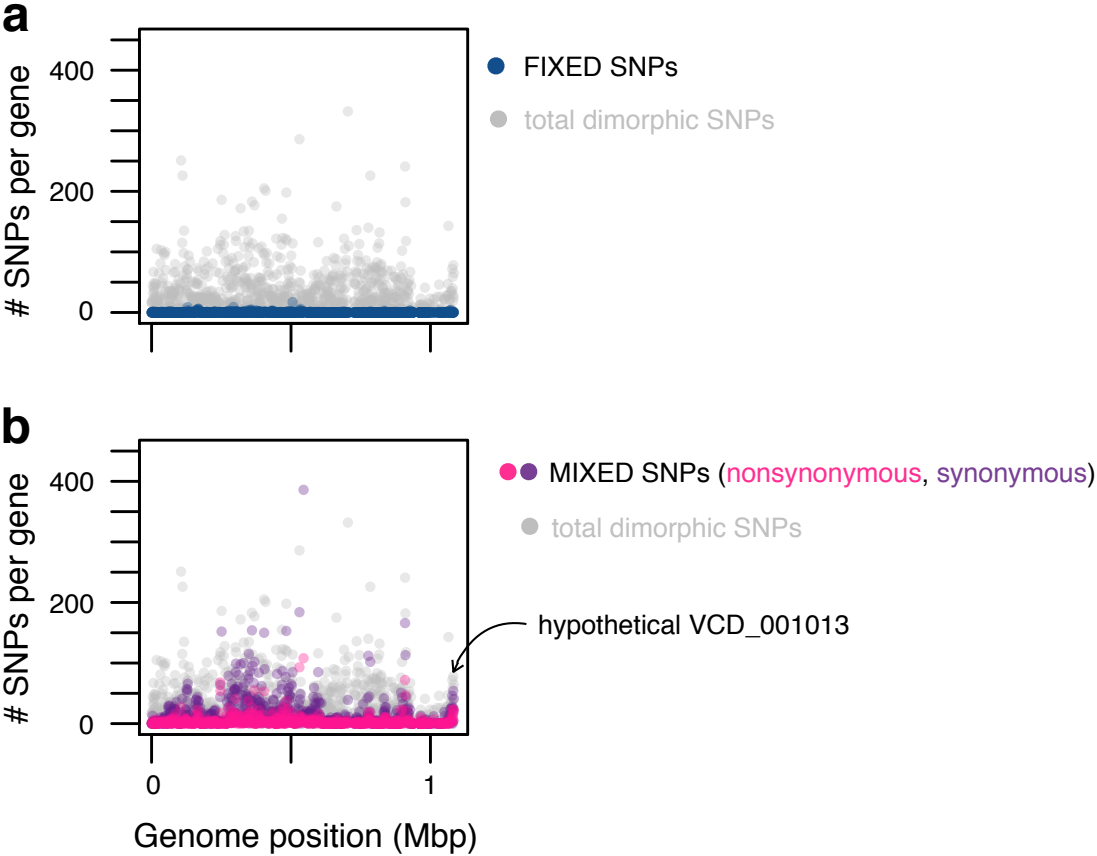

563

564 **Supplementary Figure 3. Distribution of fixed and mixed SNPs across chromosome 2. a,**  
565 **Distribution of fixed SNPs across chromosome 2 in the primary dataset. b, Distribution of mixed SNPs**  
566 **across chromosome 2. Genome position is according to the MJ-1236 reference genome. See Fig. 1b and**  
567 **1c in the main text for descriptions of fixed and mixed SNP sites. Arrow shows a candidate VAP (Table 1).**  
568

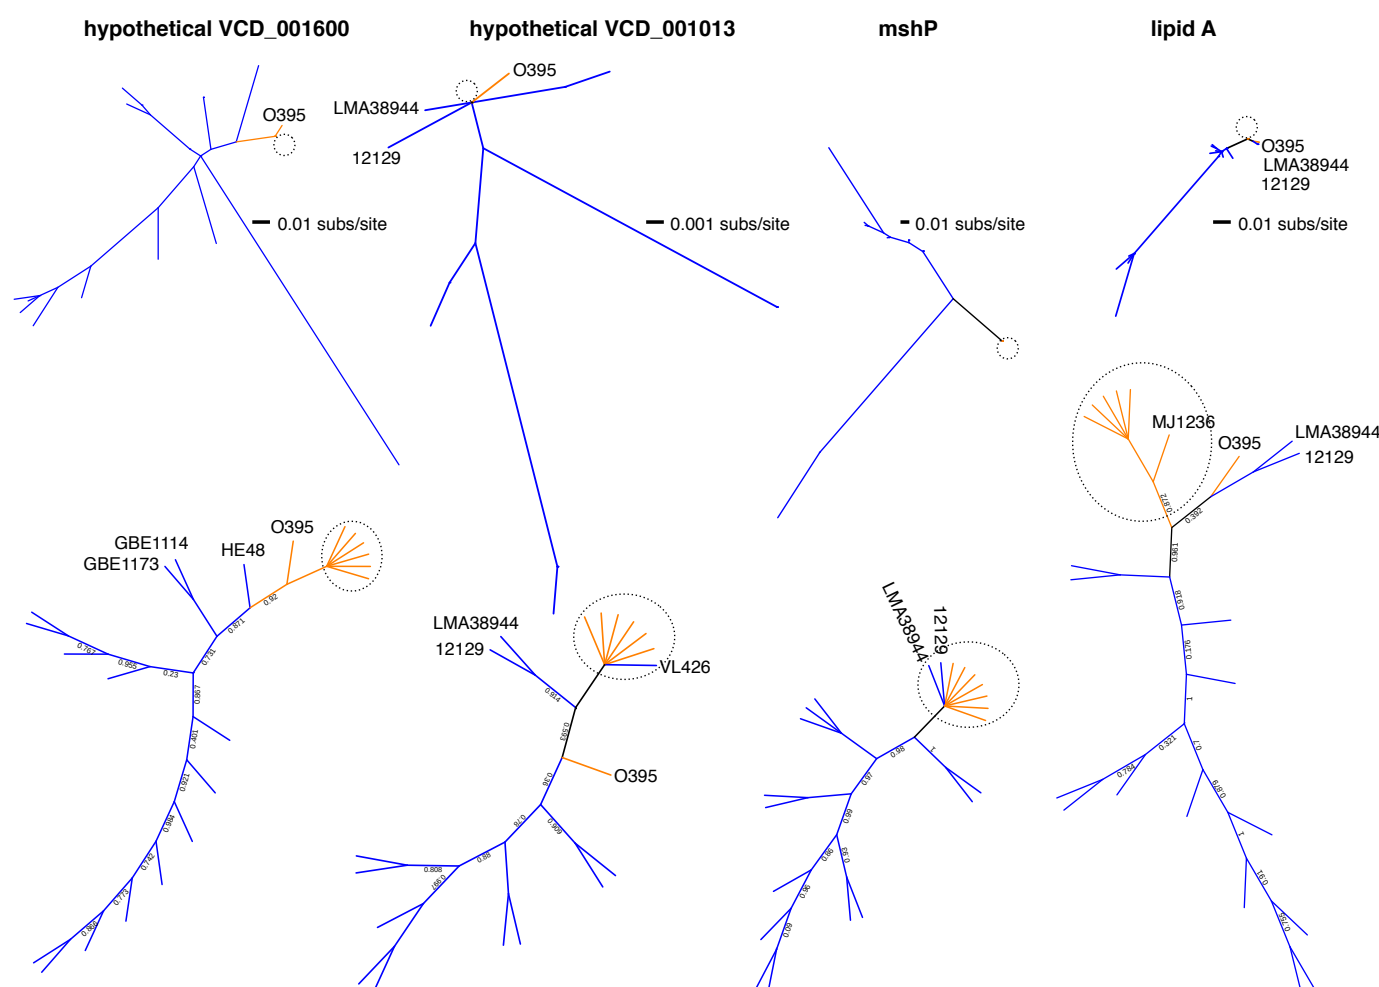

**Supplementary Figure 4. Gene trees for additional candidate VAPs.** Gene trees are shown for the four other candidate VAPs listed in Table 1, excluding *ompU* (Figure 1d). Top panels show branch lengths to scale; bottom panels show local support values and branches not to scale. Branches leading to EGs are blue; branches leading to PGs are in orange. The dotted circle indicates a clade containing most of the PGs (sometimes without O395 and sometimes with EGs, as indicated) which have identical sequences and are not visible in trees with branch lengths to scale (top). The lipid A core O-antigen ligase (VCD\_001230) and *ompU* (Figure 1d) were grouped into orthologous gene families, which were aligned with Muscle and used to infer trees with FastTree. The other three genes were not grouped into gene families and were extracted from the mugsy alignment, realigned with Muscle and used to infer trees with FastTree (Methods).

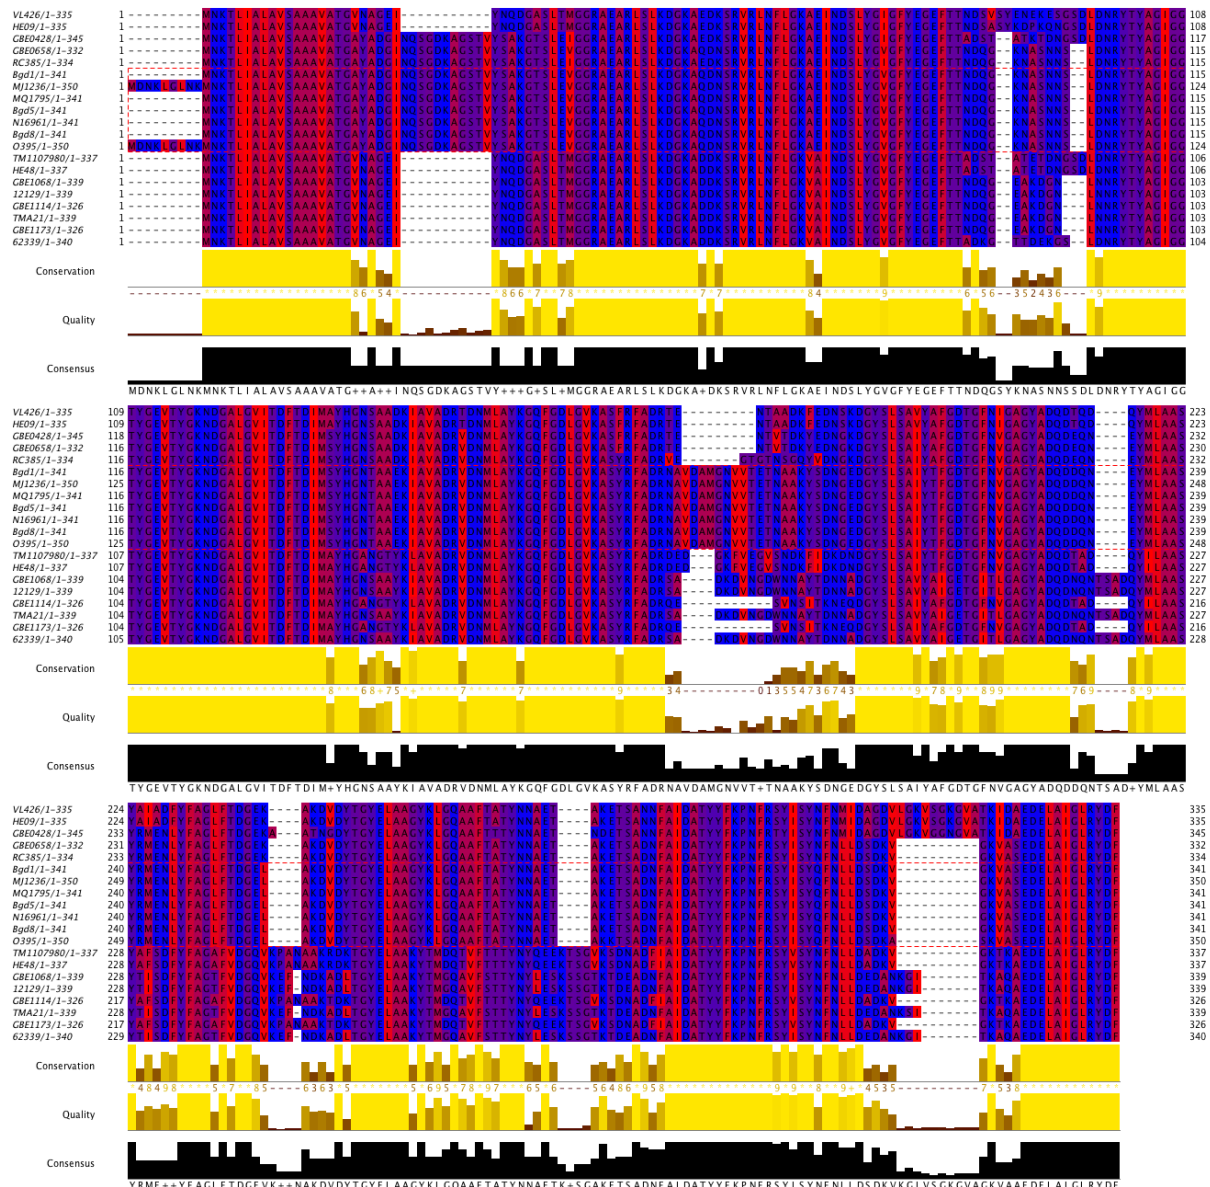

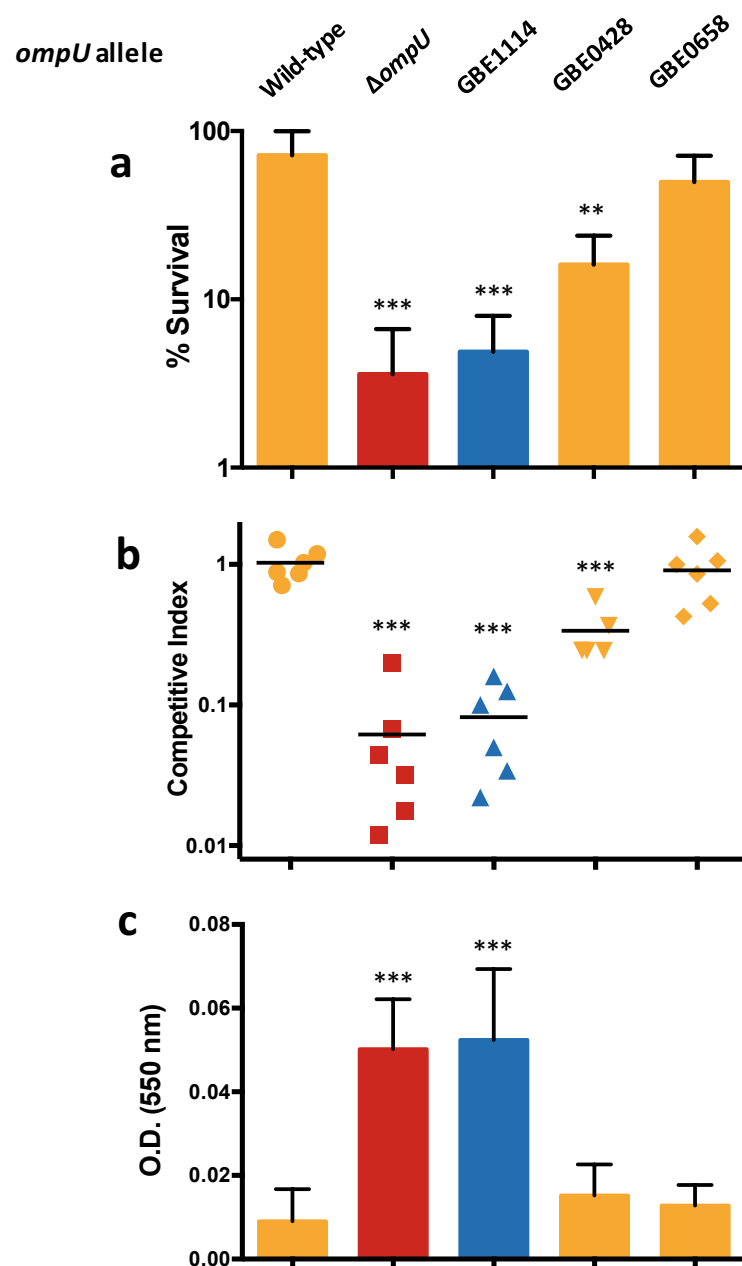

**Supplementary Figure 6. Phenotypic characterization of *ompU* alleles in classical background.** **a**, Survival of *ompU* mutants in the presence of bile. **b**, Colonization of the small intestine of *ompU* mutant strains. **c**, Biofilm formation of *ompU* mutant strains on an abiotic surface. Yellow bars and symbols, PG-like allele; red bars and squares,  $\Delta ompU$ ; blue bars and triangles, EG-like allele. Statistical comparisons were made using student's *t*-test. \*\**P* < 0.01, \*\*\**P* < 0.001.

## Supplementary tables

**Supplementary Table 1. *V. cholerae* genomes used in this study.** The 22 genomes in the primary dataset are listed here; for a list of genomes in the replication dataset, see Methods and Orata *et al.*<sup>27</sup>.

| Short name | PG/EG | Source                               | Accession number; source of strain        |
|------------|-------|--------------------------------------|-------------------------------------------|
| Bgd1       | PG    | O1 Ogawa El Tor, Bangladesh clinical | This study; Son et al. <sup>54</sup>      |
| Bgd5       | PG    | O1 Inaba El Tor, Bangladesh clinical | This study; Son et al. <sup>54</sup>      |
| Bgd8       | PG    | O1 Ogawa El Tor, Bangladesh clinical | This study; Son et al. <sup>54</sup>      |
| N16961     | PG    | O1 Inaba El Tor, Bangladesh clinical | AE003852-3                                |
| MJ1236     | PG    | O1 Inaba El Tor, Bangladesh clinical | CP001485-6                                |
| MQ1795     | PG    | O1 Inaba El Tor, Bangladesh clinical | This study; Son et al. <sup>54</sup>      |
| O395       | PG    | O1 Ogawa Classical, India clinical   | CP000626/CP000627                         |
| GBE0428    | EG    | non-O1, USA oyster                   | This study; Schuster et al. <sup>26</sup> |
| GBE0658    | EG    | non-O1, USA water                    | This study; Schuster et al. <sup>26</sup> |
| GBE1068    | EG    | non-O1, USA oyster                   | This study; Schuster et al. <sup>26</sup> |
| GBE1114    | EG    | non-O1, USA water                    | This study; Schuster et al. <sup>26</sup> |
| GBE1173    | EG    | non-O1, USA sediment                 | This study; Schuster et al. <sup>26</sup> |
| 12129      | EG    | O1 Inaba El Tor, Australia water     | ACFQ00000000                              |
| LMA38944   | EG    | O1, Brazil water                     | CP002555-6                                |
| CT536993   | EG    | unknown serogroup, Brazil sewage     | ADAL01000000                              |
| RC385      | EG    | O135, USA plankton                   | AAKH02000000                              |
| VL426      | EG    | non-O1/O139 Albensis, UK water       | ACHV00000000                              |

|           |    |                                |              |
|-----------|----|--------------------------------|--------------|
| HE09      | EG | unknown serogroup, Haiti water | AFOP01000000 |
| TM1107980 | EG | O1 Ogawa El Tor, Brazil sewage | ACHW00000000 |
| HE48      | EG | unknown serogroup, Haiti water | AFOR01000000 |
| TMA21     | EG | non-O1/O139, Brazil water      | ACHY00000000 |
| 62339     | EG | non-O1/O139, Bangladesh water  | AAWG00000000 |

597

**Supplementary Table 2. Summary statistics of SNPs in both datasets.** fixN = fixed nonsynonymous SNPs; fixS = fixed synonymous SNPs; fixM = mixed nonsynonymous SNPs; mixS = mixed synonymous SNPs; sd = standard deviation.

|                                | Dataset |             |
|--------------------------------|---------|-------------|
|                                | Primary | Replication |
| total SNPs                     | 136,160 | 146,309     |
| total fixed                    | 819     | 2,772       |
| total mixed                    | 39,171  | 86,370      |
| total SNPs in genes            | 121,254 | 130,035     |
| total fixN in genes            | 210     | 597         |
| total fixS in genes            | 504     | 1,865       |
| total mixN in genes            | 6,982   | 14,418      |
| total mixS in genes            | 27,366  | 62,509      |
| proportion fixed SNPs in genes | 0.87    | 0.89        |
| proportion mixed SNPs in genes | 0.88    | 0.89        |
| mean mixed SNPs per gene       | 10.3    | 22.6        |
| median mixed SNPs per gene     | 3       | 12          |
| median mixN per gene           | 0       | 2           |
| sd mixN per gene               | 5.85    | 7.92        |
| median mixN + 2sd              | 11.70   | 17.85       |
| median mixN/mixS per gene      | 0.50    | 0.33        |
| sd mixN/mixS per gene          | 0.64    | 0.66        |
| median mixN/mixS + 2sd         | 1.78    | 1.65        |
| median fixN per gene           | 0       | 0           |
| sd fixN per gene               | 0.34    | 0.75        |
| median fixN + 2sd              | 0.68    | 1.50        |
| median fixN/fixS per gene      | 1       | 1           |
| sd fixN/fixS per gene          | 0.24    | 0.35        |
| median fixN/fixS + 2sd         | 1.48    | 1.70        |

**Supplementary Table 3. Gene families present in all seven phylocore genomes (PGs) and absent in all 15 environmental genomes (EGs) in the primary dataset.**

| Locus            | Gene ID | Annotation                                        | Presence in replication dataset |
|------------------|---------|---------------------------------------------------|---------------------------------|
| <b>1</b>         | VCA0790 | Possible integrase (RefSeq)                       | Present in all 7 PGs + 2 EGs    |
|                  | VCA0793 | Phage regulatory protein, Rha-like (IPR019104)    | Not assigned to gene family     |
|                  | VCA0795 | Site-specific recombinase PinR (COG1961)          | Not assigned to gene family     |
| <b>2</b>         | VCA1042 | Integral membrane protein CcmA (COG1664)          | Present in all 7 PGs + 1 EG     |
|                  | VCA1043 | tagE protein (RefSeq)                             | Not assigned to gene family     |
| <b>3 (CTX)</b>   | VC1462  | CTX phage RstB (IPR010008)                        | Present in 6 PGs + 2 EGs        |
| <b>4 (VPI-1)</b> | VC0824  | Peroxiredoxin Tpx (COG2077)                       | Present in all 7 PGs + 1 EG     |
|                  | VC0831  | Toxin-coregulated pilus biosynthesis protein TcpC | Present in all 7 PGs + 4 EGs    |
|                  | VC0835  | Toxin-coregulated pilus biosynthesis protein T    | Present in all 7 PGs + 3 EGs    |
|                  | VC0836  | Toxin-coregulated pilus biosynthesis protein E    | Present in all 7 PGs + 4 EGs    |
|                  | VC0838  | TCP virulence regulatory protein TcpN             | Present in all 7 PGs + 4 EGs    |
| <b>5 (VSP-2)</b> | VCA0483 | Hypothetical protein (RefSeq)                     | Not assigned to gene family     |

Gene IDs are from the *V. cholerae* O1 biovar El Tor N16961 reference genome. Gene order and annotations are nearly identical in *V. cholerae* MJ-1236. The 5 loci are defined as clusters of adjacent or nearly adjacent genes (0-6 genes apart in either reference genome)

# **Supplementary Table 4. Genome-wide McDonald-Kreitman test between PGs and EGs.**

Primary dataset:

| Polymorphism from: | FN  | FS  | FN/FS | PN   | PS    | PN/PS | Obs. FI | Exp. FI | <i>P</i> (obs > exp) |
|--------------------|-----|-----|-------|------|-------|-------|---------|---------|----------------------|
| PG                 | 210 | 504 | 0.42  | 1022 | 4433  | 0.23  | 1.81    | 1.76    | 0.12                 |
| EG                 |     |     |       | 6982 | 27366 | 0.26  | 1.63    | 1.06    | <0.001               |

Replication dataset:

| Polymorphism from: | FN  | FS   | FN/FS | PN    | PS    | PN/PS | Obs. FI | Exp. FI | <i>P</i> (obs > exp) |
|--------------------|-----|------|-------|-------|-------|-------|---------|---------|----------------------|
| PG                 | 597 | 1865 | 0.32  | 2694  | 14342 | 0.19  | 1.70    | 1.67    | 0.068                |
| EG                 |     |      |       | 14418 | 62509 | 0.23  | 1.39    | 0.98    | <0.001               |

Total genomewide counts of classes of mutations: FN = fixed nonsynonymous, FS = fixed synonymous, PN = polymorphic nonsynonymous, PS = polymorphic synonymous. Fixed indicates that one allele is present in all PGs and a different allele in all EGs. Fixation Index (FI) = (FN/FS)/(PN/PS)

**Supplementary Table 5. Characteristics of three additional predicted VAPs with an excess of nonsynonymous mixed SNPs in the replication dataset.**

| Gene ID (VCD #) | Annotation                        | Gene length (bp) | Total # SNPs | Fixed NS | Fixed S | Mixed NS | Mixed S | <i>P</i>         |
|-----------------|-----------------------------------|------------------|--------------|----------|---------|----------|---------|------------------|
| 1 001506        | hypothetical                      | 331              | 21 (7)       | 0 (0)    | 0 (0)   | 20 (0)   | 1 (0)   | 4.11e-9 (n.s.)   |
| 2 003509        | hypothetical; possible pseudogene | 684              | 77 (35)      | 0 (0)    | 0 (0)   | 31 (4)   | 18 (0)  | 1.74e-5 (0.0625) |
| 3 000213        | hypothetical                      | 3261             | 149 (118)    | 0 (0)    | 0 (0)   | 19 (54)  | 7 (64)  | 3.99e-5 (n.s.)   |

NS=nonsynonymous; S=synonymous. The genes listed have mixed NS and mixed NS:S both over two standard deviations above the genome-wide median in the replication dataset. A binomial test determined if the mixed NS:S ratio was greater than the expected genome-wide median value of 0.33 per gene. Numbers in parentheses are for the primary dataset, with an expected genome-wide median mixed N:S of 0.5. *P*-values greater than 0.1 are denoted as not significant (n.s.). Note that the only predicted VAP gene with a significant *P*-value in both primary (Table 1) and replication datasets with mixed N:S less than two (the neutral expectation, based on approximately two nonsynonymous sites and one synonymous site per codon) is VCD\_003509, annotated in MJ-1236 as a predicted pseudogene. This is consistent with approximately neutral evolution of pseudogenes.
